# Supplementary material for: Sequelae of Severe Acute Respiratory Syndrome Coronavirus 2 (SARS-CoV-2) Infection among Kidney Transplant Recipients: A Large Single-Center Experience
Source: Hindawi journal article supplement (doi:10.1155/2024/7140548), 2024-05-02

Supplemental Figure 1: Changes in eGFR

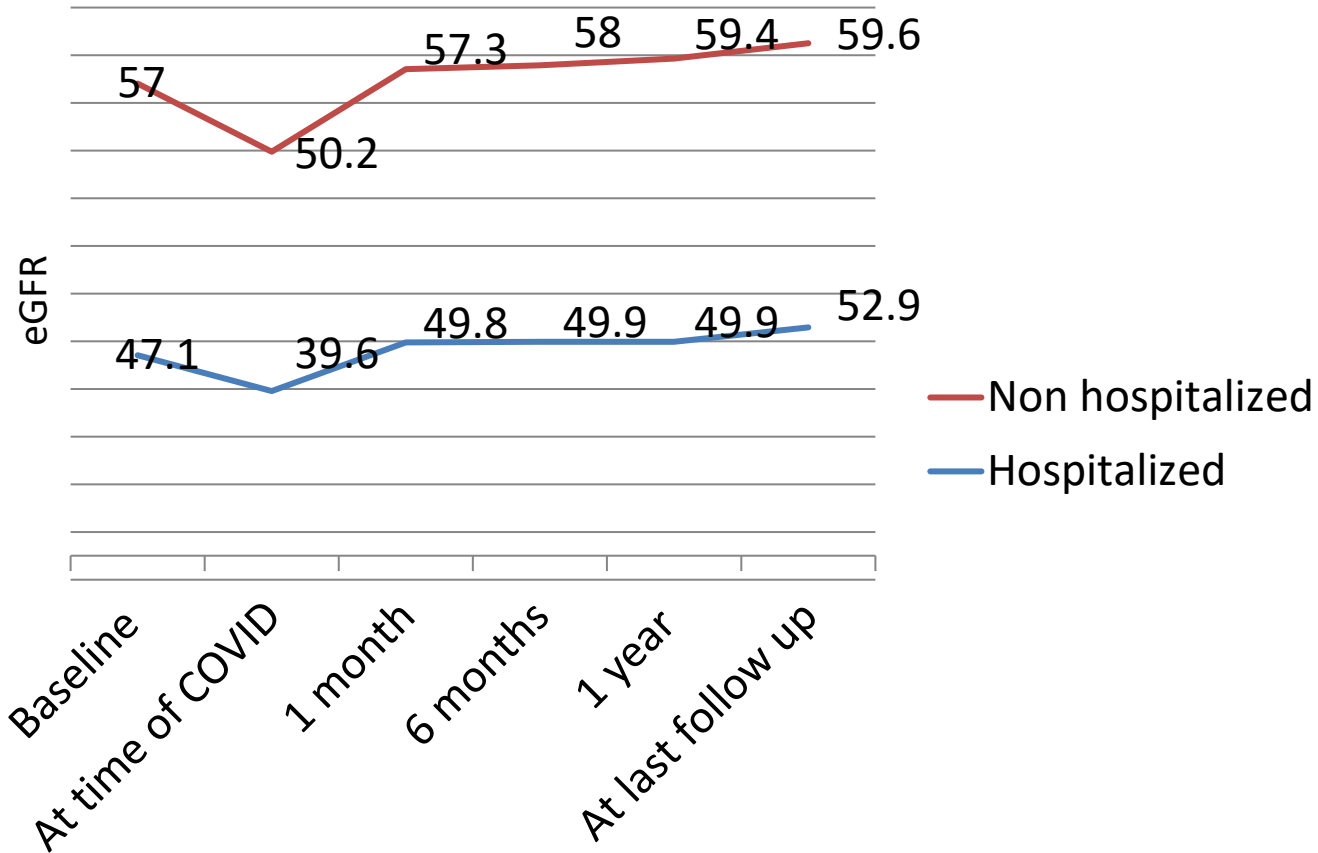

Supplement: f1 [file 7140548.f1.pdf]
